# Supplementary material for: Se-Doped Ni5P4 Nanocatalysts for High-Efficiency Hydrogen Evolution Reaction
Source: MDPI journal article supplement (doi:10.3390/catal12091055), 2022-09-16
Supplement: s1 [file s1]

**Supporting Information for**  
**Se-doped Ni<sub>5</sub>P<sub>4</sub> nanocatalysts for high-efficiency hydrogen evolution**  
**reaction**

Cuihua An<sup>1,5</sup>, Yuchen Wang<sup>5</sup>, Penggang Jiao<sup>1</sup>, Shuai Wu<sup>1,\*</sup>, Lingxiao Gao<sup>1</sup>, Chunyou Zhu<sup>3</sup>, and Junsheng Li<sup>2,\*</sup>, Ning Hu<sup>4</sup>

<sup>1</sup> Key Laboratory of Hebei Province on Scale-span Intelligent Equipment Technology, and School of Mechanical Engineering, Hebei University of Technology, Tianjin 300401, China;

<sup>2</sup> School of Chemistry, Chemical Engineering and Life Sciences, Wuhan University of Technology, Wuhan 430070, China;

<sup>3</sup> Hunan Aerospace Kaitian Water Services Co., Ltd., Changsha 410100, China;

<sup>4</sup> State Key Laboratory of Reliability and Intelligence Electrical Equipment, Hebei University of Technology, Tianjin, 300130, China;

<sup>5</sup> Institute for New Energy Materials & Low-Carbon Technologies, School of Materials Science and Engineering, Tianjin University of Technology, Tianjin 300384, China;

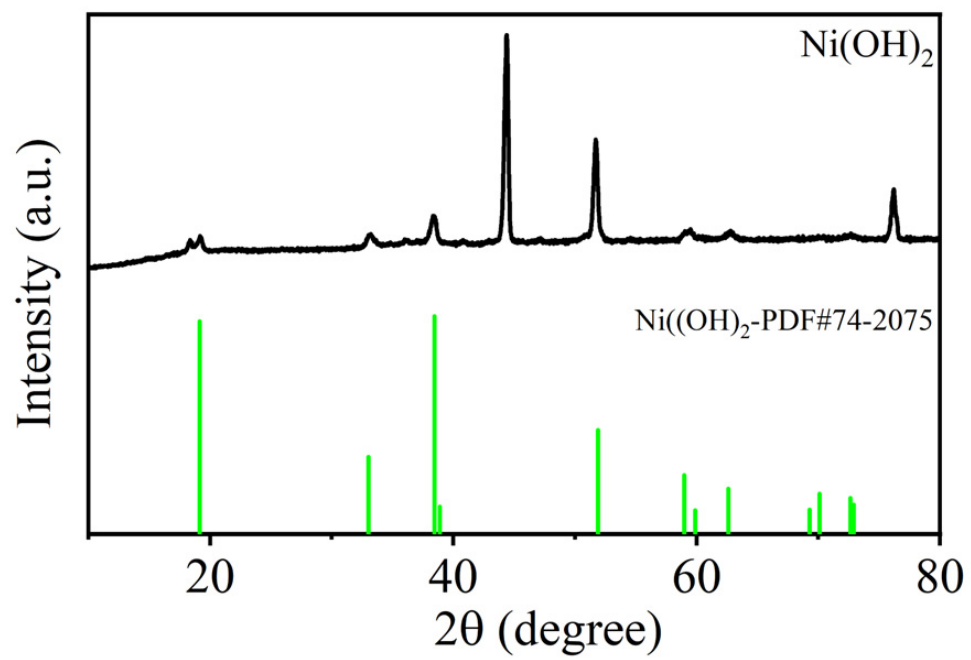

Figure S1 XRD patterns of  $\text{Ni}(\text{OH})_2$  precursors.

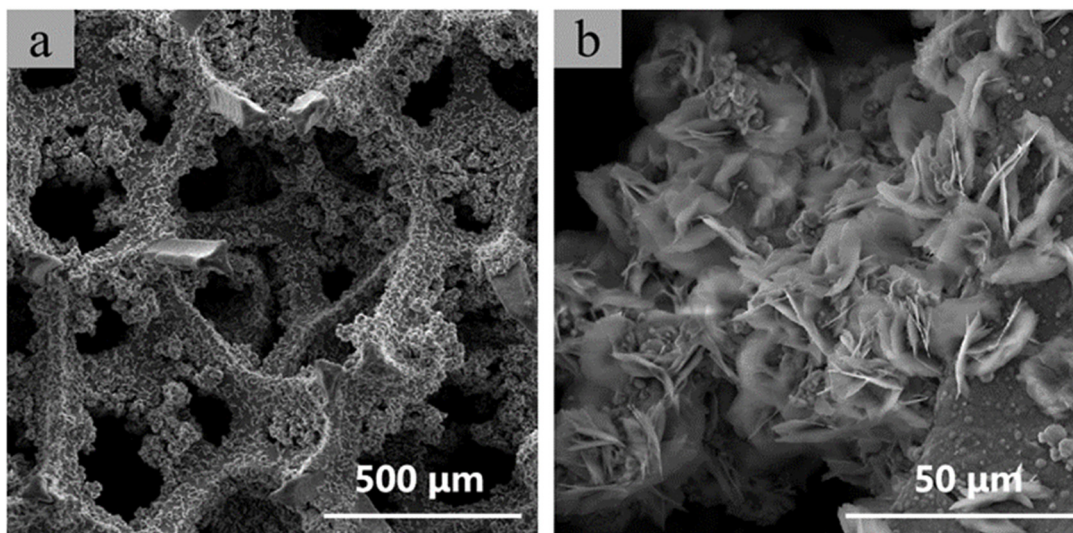

Figure S2 SEM images (a-b) of  $\text{Ni(OH)}_2$  precursor.

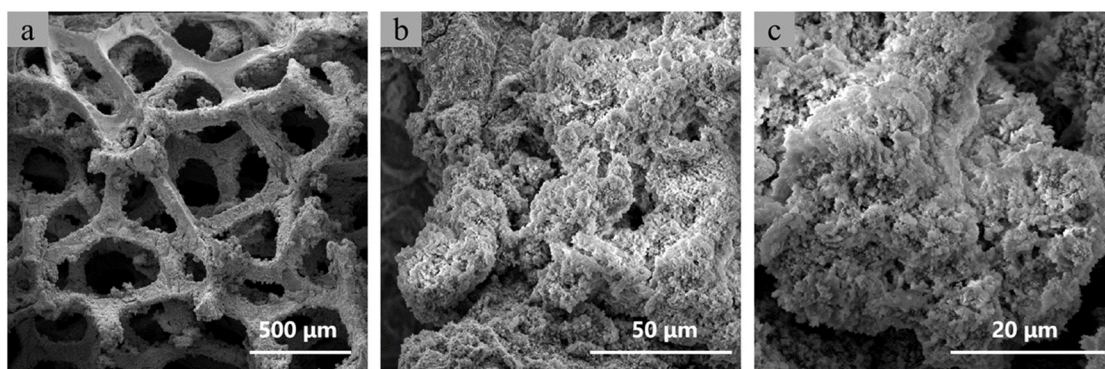

Figure S3 SEM images (a-c) of  $\text{Ni}_5\text{P}_4$ .

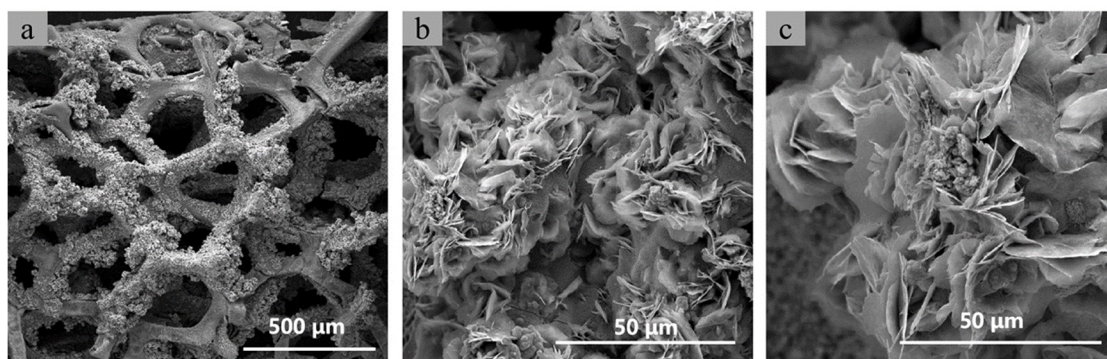

Figure S4 SEM images (a-c) of NiSe<sub>2</sub>.

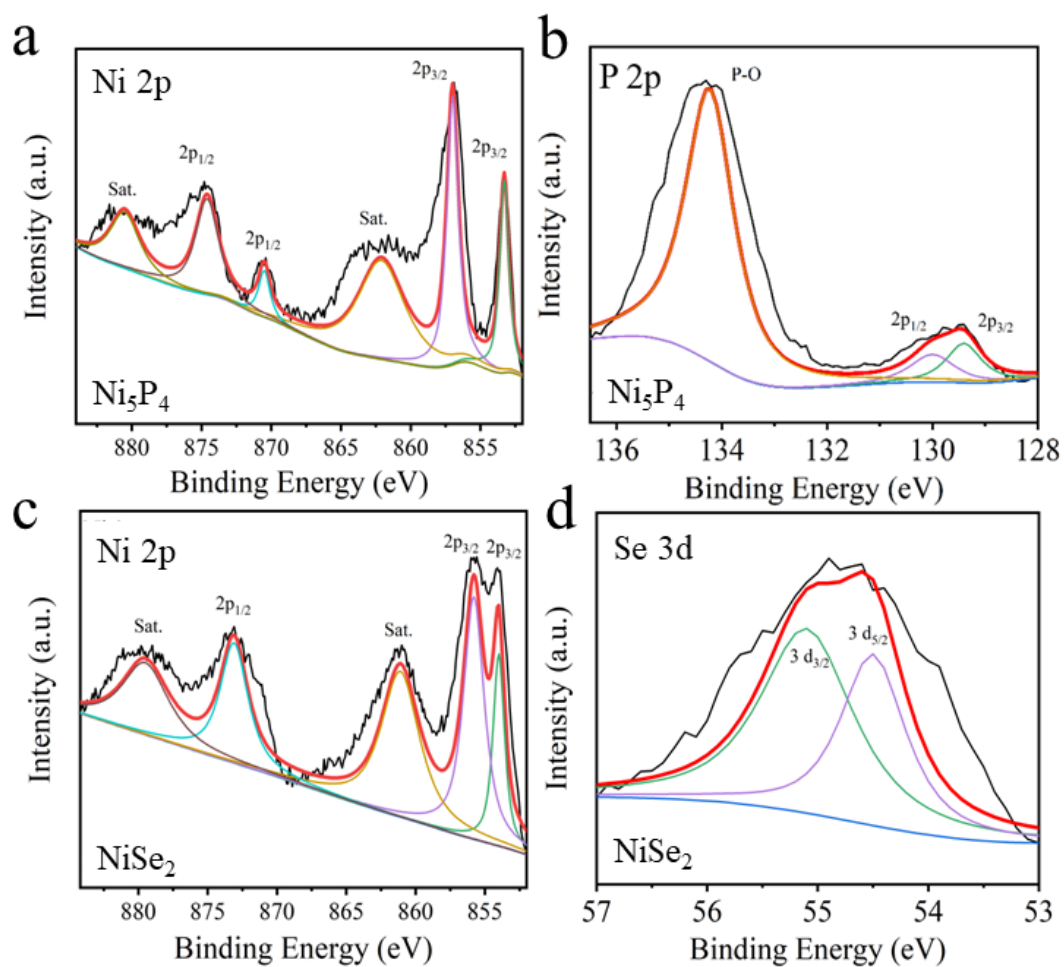

Figure S5 High-resolution XPS spectra of  $\text{Ni}_5\text{P}_4$  and  $\text{NiSe}_2$ , (a) Ni 2p in pure  $\text{Ni}_5\text{P}_4$ , (b) P 2p in pure  $\text{Ni}_5\text{P}_4$ , (c) Ni 2p in  $\text{NiSe}_2$ , (d) Se 3d in  $\text{NiSe}_2$

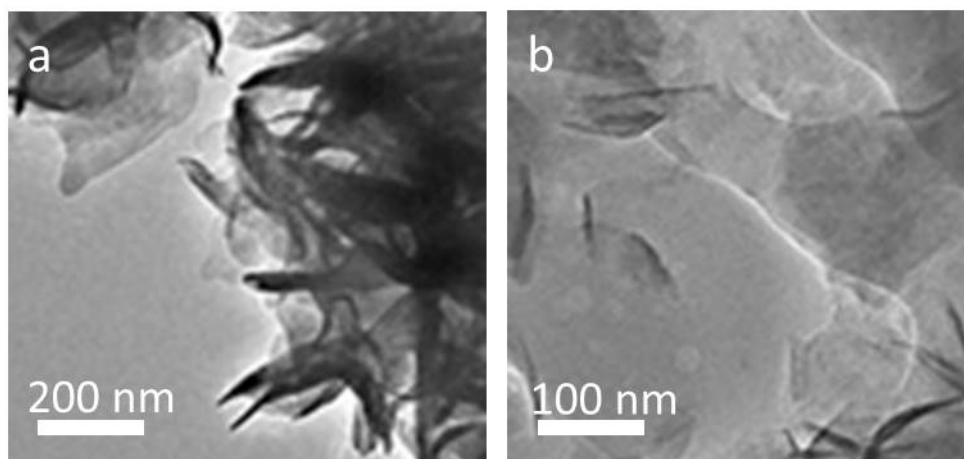

Figure S6 TEM images (a-b) of  $\text{Ni}_5\text{P}_4\text{-Se}$  composites.

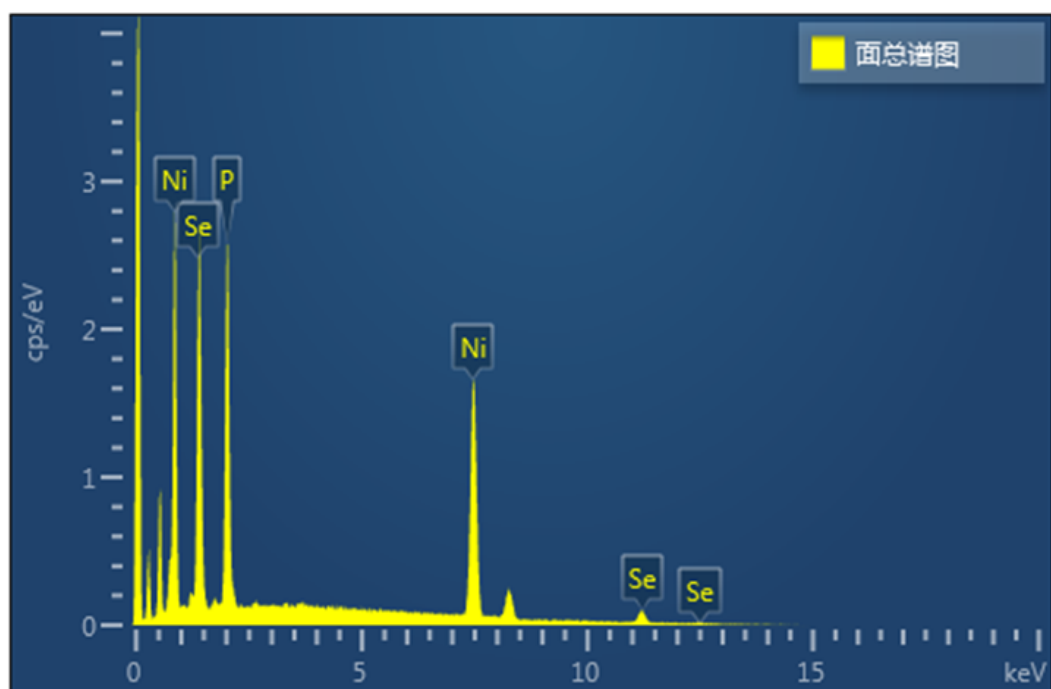

Figure S7 Energy spectrum for  $\text{Ni}_5\text{P}_4\text{-Se}$  composites.

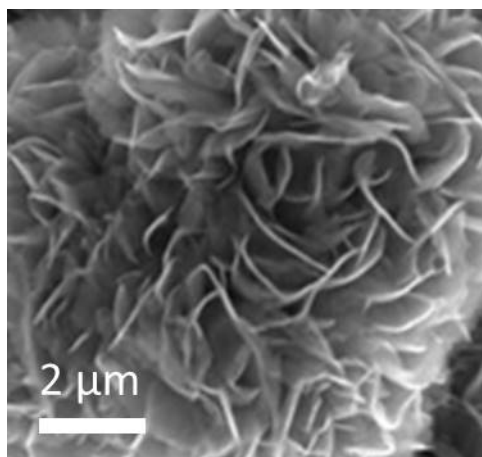

Figure S8 SEM image of  $\text{Ni}_5\text{P}_4\text{-Se}$  catalyst after long cycles.

Table S1 Comparison of the catalytic activity of catalysts

| Catalyst                                 | Electrolyte    | Overpotential<br>(mV vs.RHE) | Tafel<br>(mV dec <sup>-1</sup> ) | Reference        |
|------------------------------------------|----------------|------------------------------|----------------------------------|------------------|
| PNi <sub>3</sub> S <sub>2</sub> /NF      | 1 M KOH        | 137                          | 147                              | [1]              |
| NiCo/Sm <sub>2</sub> O <sub>3</sub>      | 1 M KOH        | 276                          | 162                              | [2]              |
| Ni <sub>2</sub> P/LSCN                   | 0.1 M KOH      | 339                          | 105                              | [3]              |
| NiFe LDH@DG                              | 1 M KOH        | 270                          | 110                              | [4]              |
| Ni <sub>2</sub> P nanofilms              | 0.1 M KOH      | 315                          | 120                              | [5]              |
| np-NiFeMoP                               | 1 M KOH        | 223                          | 180.3                            | [6]              |
| FeP                                      | 1 M KOH        | 181                          | 134                              | [7]              |
| Cu <sub>0.3</sub> Co <sub>1.7</sub> P/NC | 1 M KOH        | 220                          | 122                              | [8]              |
| Ni <sub>2</sub> P                        | 1 M KOH        | 183                          | -                                | [9]              |
| CoNiP-1:1 NWs                            | 1 M KOH        | 252                          | 128                              | [10]             |
| <b>Ni<sub>5</sub>P<sub>4</sub>-Se</b>    | <b>1 M KOH</b> | <b>128</b>                   | <b>163.14</b>                    | <b>This work</b> |

## References

1. Ding, Y. H.; Li, H. Y.; Hou, Y., Phosphorus-doped nickel sulfides/nickel foam as electrode materials for electrocatalytic water splitting. *Int. J. Hydrog. Energy* **2018**, *43*, 19002-19009.
2. Liu, H. H.; Zeng, S.; He, P.; Dong, F. Q.; He, M. Q.; Zhang, Y.; Wang, S.; Li, C. X.; Liu, M. Z.; Jia, L. P., Samarium oxide modified Ni-Co nanosheets based three-dimensional honeycomb film on nickel foam: A highly efficient electrocatalyst for hydrogen evolution reaction. *Electrochim. Acta* **2019**, *299*, 405-414.
3. Wang, Y. R.; Wang, Z. J.; Jin, C.; Li, C.; Li, X. W.; Li, Y. F.; Yang, R. Z.; Liu, M. L., Enhanced overall water electrolysis on a bifunctional perovskite oxide through interfacial engineering. *Electrochim. Acta* **2019**, *318*, 120-129.
4. Jia, Y.; Zhang, L. Z.; Gao, G. P.; Chen, H.; Wang, B.; Zhou, J. Z.; Soo, M. T.; Hong, M.; Yan, X. C.; Qian, G. R.; Zou, J.; Du, A. J.; Yao, X. D., A Heterostructure Coupling of Exfoliated Ni-Fe Hydroxide Nanosheet and Defective Graphene as a Bifunctional Electrocatalyst for Overall Water Splitting. *Adv. Mater.* **2017**, *29*, 8.
5. Li, Y.; Cai, P. W.; Ci, S. Q.; Wen, Z. H., Strongly Coupled 3D Nanohybrids with Ni<sub>2</sub>P/Carbon Nanosheets as pH-Universal Hydrogen Evolution Reaction Electrocatalysts. *ChemElectroChem* **2017**, *4*, 340-344.

6. Qian, H. X.; Li, K. Y.; Mu, X. B.; Zou, J. Z.; Xie, S. H.; Xiong, X. B.; Zeng, X. R., Nanoporous NiFeMoP alloy as a bifunctional catalyst for overall water splitting. *Int. J. Hydrog. Energy* **2020**, *45*, 16447-16457.
7. Lv, C. C.; Peng, Z.; Zhao, Y. X.; Huang, Z. P.; Zhang, C., The hierarchical nanowires array of iron phosphide integrated on a carbon fiber paper as an effective electrocatalyst for hydrogen generation. *J. Mater. Chem. A* **2016**, *4*, 1454-1460.
8. Song, J. H.; Zhu, C. Z.; Xu, B. Z.; Fu, S. F.; Engelhard, M. H.; Ye, R. F.; Du, D.; Beckman, S. P.; Lin, Y. H., Bimetallic Cobalt-Based Phosphide Zeolitic Imidazolate Framework: CoPx Phase-Dependent Electrical Conductivity and Hydrogen Atom Adsorption Energy for Efficient Overall Water Splitting. *Adv. Energy Mater.* **2017**, *7*, 9.
9. Read, C. G.; Callejas, J. F.; Holder, C. F.; Schaak, R. E., General Strategy for the Synthesis of Transition Metal Phosphide Films for Electrocatalytic Hydrogen and Oxygen Evolution. *ACS Appl. Mater. Interfaces* **2016**, *8*, 12798-12803.
10. Amorim, I.; Xu, J. Y.; Zhang, N.; Xiong, D. H.; Thalluri, S. M.; Thomas, R.; Sousa, J. P. S.; Araujo, A.; Li, H.; Liu, L. F., Bi-metallic cobalt-nickel phosphide nanowires for electrocatalysis of the oxygen and hydrogen evolution reactions. *Catal. Today* **2020**, *358*, 196-202.
